# Supplementary material for: Role of transient receptor potential ankyrin 1 channels in Alzheimer’s disease
Source: Springer Nature journal article supplement (doi:10.1186/s12974-016-0557-z), 2016-04-27
Supplement: MOESM1 [file 10057514]

## Supplementary Information

### Role of transient receptor potential ankyrin 1 channels in Alzheimer's disease

Kuan-I Lee, Hsueh-Te Lee, Hui-Ching Lin, Huey-Jen Tsay, Feng-Chuan Tsai,

Song-Kun Shyue, Tzong-Shyuan Lee

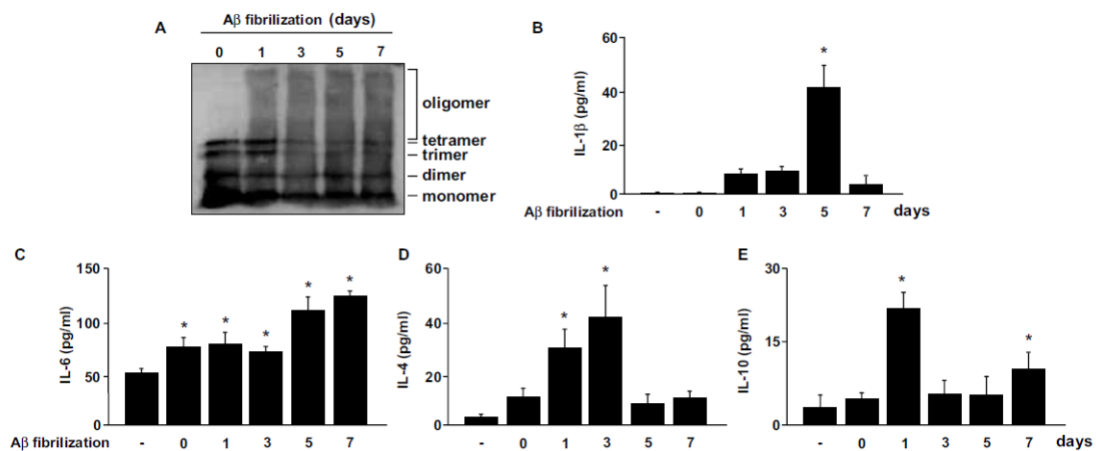

**Supplementary Fig. S1. Different degree of Aβ fibrilization induces diverse inflammatory cytokine production in primary astrocytes.** Aβ fibrilization was performed by incubating Aβ with sterile water at 37°C for 1-7 days. After 5 days of incubation, Aβ formed a robust high-molecular-weight oligomer. (a) Western blot analysis of Aβ protein level. (b-e) Primary astrocytes were treated with different fibrilization conditions of Aβ (2 μM) for 24 h. ELISA of IL-1β, IL-6, IL-4 and IL-10 secretion in culture medium of WT astrocytes. Data are mean ± SEM from 5 independent experiments. \*, *P* < 0.05 vs. vehicle.

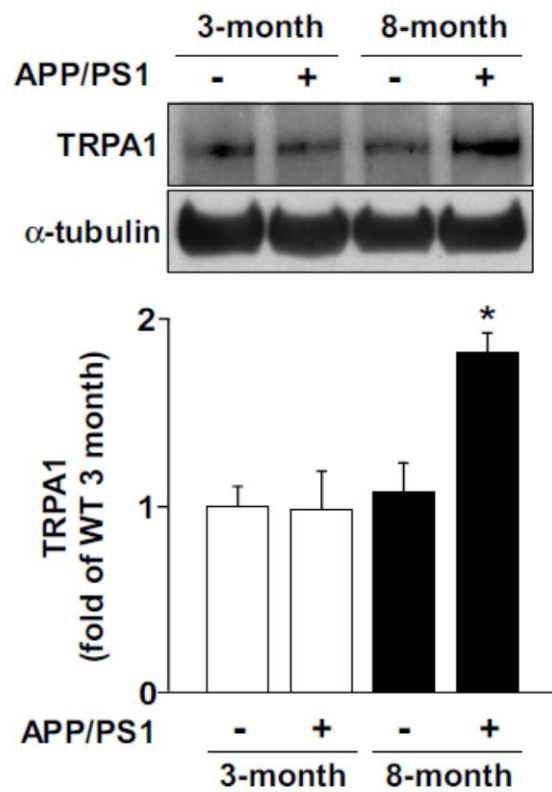

**Supplementary Fig. S2. Protein expression of TRPA1 channels in APP/PS1 Tg mice at 3 and 8 months old.** Brains were harvested from WT and APP/PS1 Tg mice at 3 and 8 months old. Western blot analysis of TRPA1 and  $\alpha$ -tubulin protein levels. Data are mean  $\pm$  SEM from 6 mice in each group. \*,  $P < 0.05$  vs. WT mice.

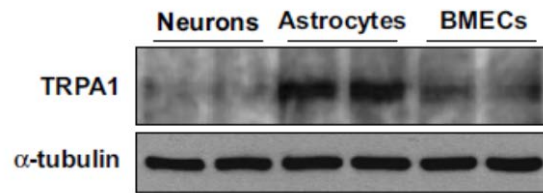

**Supplementary Fig. 3. The protein expression of TRPA1 in neurons, astrocytes and endothelial cells.** Western blot analysis of TRPA1 and  $\alpha$ -tubulin in primary neurons, astrocytes and brain microvascular endothelial cells (BMECs) bEND.3 cells.

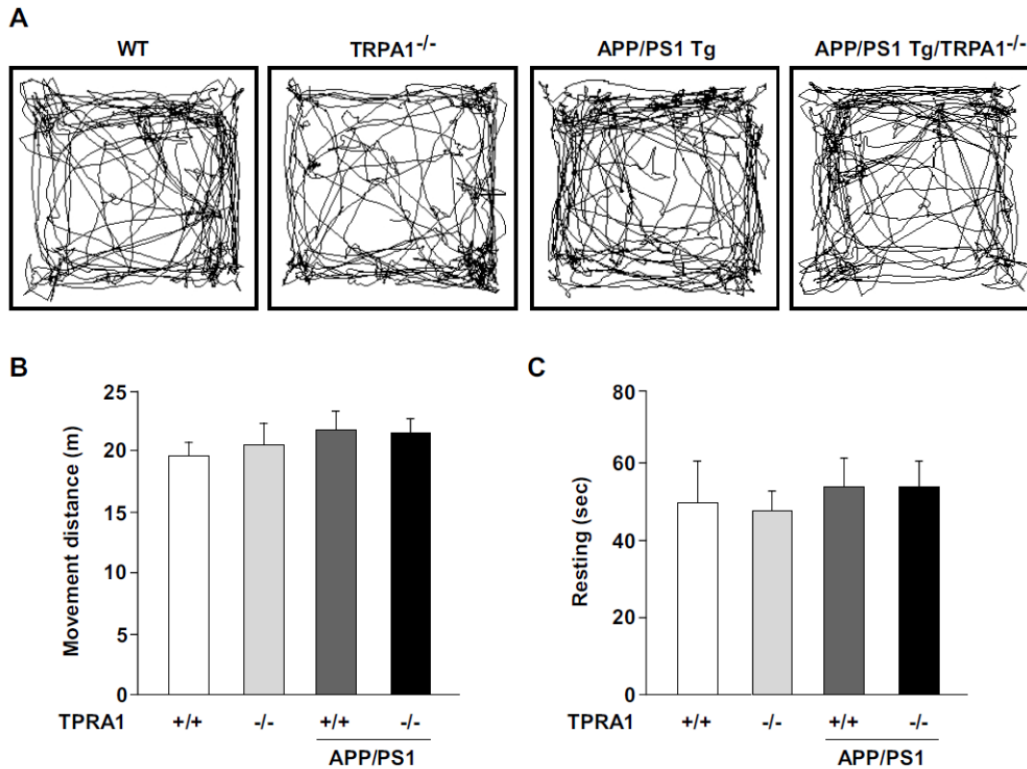

**Supplementary Fig. S4. Loss of function of TRPA1 channels does not affect locomotion activity in WT mice, TRPA1<sup>-/-</sup> mice, APP/PS Tg mice and APP/PS1 Tg/TRPA1<sup>-/-</sup> mice.** (a) Representative examples, (b) movement distance and (c) resting time of open field activity for 8-month-old WT mice, TRPA1<sup>-/-</sup> mice, APP/PS Tg mice and APP/PS1 Tg/TRPA1<sup>-/-</sup> mice. Data are mean  $\pm$  SEM from 8 mice in each group.

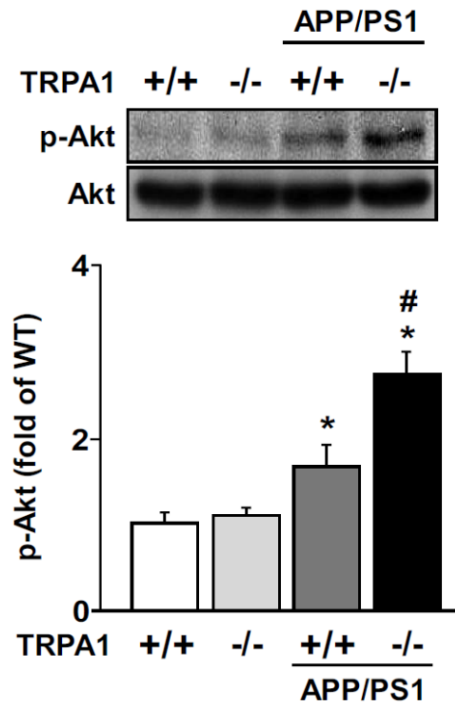

**Supplementary Fig. S5. The phosphorylation of Akt is increased in APP/PS1 Tg mice or APP/PS1 Tg/TRPA1<sup>-/-</sup> mice.** Brain specimens were harvested from 8-month-old WT mice, TRPA1<sup>-/-</sup> mice, APP/PS1 Tg and APP/PS1 Tg/TRPA1<sup>-/-</sup> mice. Western blot analysis of phosphorylated-Akt and Akt. Data are mean  $\pm$  SEM from 8 mice in each group. \*,  $P < 0.05$  vs. WT mice. #,  $P < 0.05$  vs. APP/PS1 Tg mice.
